# Supplementary material for: Biosorbent Efficacy of Groundnut Husk for the Elimination of Chromium from the Effluent of Mojo Tannery Industry, Ethiopia
Source: Hindawi journal article supplement (doi:10.1155/2022/9997348), 2022-11-10
Supplement: f1 [file 9997348.f1.pdf]

Supplementary Table 1. Effects of biosorbent dose, contact time, and agitation speed

| trt | rep | dose(gm) | Agitation speed (rpm) | contact time(Hr.) |
|-----|-----|----------|-----------------------|-------------------|
| A1  | 1   | 1        | 160                   | 2                 |
| A1  | 2   | 1        | 160                   | 2                 |
| B1  | 1   | 1        | 160                   | 2                 |
| B1  | 2   | 1        | 160                   | 2                 |
| C1  | 1   | 1        | 160                   | 2                 |
| C1  | 2   | 1        | 160                   | 2                 |
| A2  | 1   | 2        | 160                   | 2                 |
| A2  | 2   | 2        | 160                   | 2                 |
| B2  | 1   | 2        | 160                   | 2                 |
| B2  | 2   | 2        | 160                   | 2                 |
| C2  | 1   | 2        | 160                   | 2                 |
| C2  | 2   | 2        | 160                   | 2                 |
| A3  | 1   | 3        | 160                   | 2                 |
| A3  | 2   | 3        | 160                   | 2                 |
| B3  | 1   | 3        | 160                   | 2                 |
| B3  | 2   | 3        | 160                   | 2                 |
| C3  | 1   | 3        | 160                   | 2                 |
| C3  | 2   | 3        | 160                   | 2                 |
| A4  | 1   | 4        | 160                   | 2                 |
| A4  | 2   | 4        | 160                   | 2                 |
| B4  | 1   | 4        | 160                   | 2                 |
| B4  | 2   | 4        | 160                   | 2                 |
| C4  | 1   | 4        | 160                   | 2                 |
| C4  | 2   | 4        | 160                   | 2                 |
| A21 | 1   | 2        | 160                   | 1                 |
| A21 | 2   | 2        | 160                   | 1                 |
| B21 | 1   | 2        | 160                   | 1                 |
| B21 | 2   | 2        | 160                   | 1                 |
| C21 | 1   | 2        | 160                   | 1                 |
| C21 | 2   | 2        | 160                   | 1                 |
| A22 | 1   | 2        | 160                   | 2                 |
| A22 | 2   | 2        | 160                   | 2                 |
| B22 | 1   | 2        | 160                   | 2                 |
| B22 | 2   | 2        | 160                   | 2                 |
| C22 | 1   | 2        | 160                   | 2                 |
| C22 | 2   | 2        | 160                   | 2                 |
| A23 | 1   | 2        | 160                   | 3                 |
| A23 | 2   | 2        | 160                   | 3                 |
| B23 | 1   | 2        | 160                   | 3                 |
| B23 | 2   | 2        | 160                   | 3                 |
| C23 | 1   | 2        | 160                   | 3                 |
| C23 | 2   | 2        | 160                   | 3                 |
| A24 | 1   | 2        | 160                   | 4                 |
| A24 | 2   | 2        | 160                   | 4                 |
| B24 | 1   | 2        | 160                   | 4                 |
| B24 | 2   | 2        | 160                   | 4                 |
| C24 | 1   | 2        | 160                   | 4                 |
| C24 | 2   | 2        | 160                   | 4                 |

|      |   |   |     |   |
|------|---|---|-----|---|
| A160 | 1 | 2 | 160 | 2 |
| A160 | 2 | 2 | 160 | 2 |
| B160 | 1 | 2 | 160 | 2 |
| B160 | 2 | 2 | 160 | 2 |
| C160 | 1 | 2 | 160 | 2 |
| C160 | 2 | 2 | 160 | 2 |
| A200 | 1 | 2 | 200 | 2 |
| A200 | 2 | 2 | 200 | 2 |
| B200 | 1 | 2 | 200 | 2 |
| B200 | 2 | 2 | 200 | 2 |
| C200 | 1 | 2 | 200 | 2 |
| C200 | 2 | 2 | 200 | 2 |
| A80  | 1 | 2 | 80  | 2 |
| A80  | 2 | 2 | 80  | 2 |
| B80  | 1 | 2 | 80  | 2 |
| B80  | 2 | 2 | 80  | 2 |
| C80  | 1 | 2 | 80  | 2 |
| C80  | 2 | 2 | 80  | 2 |
| A120 | 1 | 2 | 120 | 2 |
| A120 | 2 | 2 | 120 | 2 |
| B120 | 1 | 2 | 120 | 2 |
| B120 | 2 | 2 | 120 | 2 |
| C120 | 1 | 2 | 120 | 2 |
| C120 | 2 | 2 | 120 | 2 |

| initial con of Total Cr(mg/L) | after bio sorption | percentage removal |
|-------------------------------|--------------------|--------------------|
| 12                            | 8.67               | 27.75              |
| 12.5                          | 8.8                | 29.6               |
| 12                            | 9.5                | 20.83333333        |
| 12.5                          | 9.7                | 22.4               |
| 12                            | 4                  | 66.66666667        |
| 12.5                          | 3.9                | 68.8               |
| 12                            | 6.67               | 44.41666667        |
| 12.5                          | 6.8                | 45.6               |
| 12                            | 6.83               | 43.08333333        |
| 12.5                          | 6.9                | 44.8               |
| 12                            | 1.17               | 90.25              |
| 12.5                          | 1.3                | 89.6               |
| 12                            | 3.83               | 68.08333333        |
| 12.5                          | 3.9                | 68.8               |
| 12                            | 4.17               | 65.25              |
| 12.5                          | 4.3                | 65.6               |
| 12                            | 1.67               | 86.08333333        |
| 12.5                          | 1.8                | 85.6               |
| 12                            | 1                  | 91.66666667        |
| 12.5                          | 1.2                | 90.4               |
| 12                            | 4.83               | 59.75              |
| 12.5                          | 4.91               | 60.72              |
| 12                            | 2                  | 83.33333333        |
| 12.5                          | 2.1                | 83.2               |
| 12                            | 7.33               | 38.91666667        |
| 12.5                          | 7.6                | 39.2               |
| 12                            | 7.17               | 40.25              |
| 12.5                          | 7.3                | 41.6               |
| 12                            | 0.67               | 94.41666667        |
| 12.5                          | 0.7                | 94.4               |
| 12                            | 6.67               | 44.41666667        |
| 12.5                          | 6.8                | 45.6               |
| 12                            | 6.83               | 43.08333333        |
| 12.5                          | 6.9                | 44.8               |
| 12                            | 1.17               | 90.25              |
| 12.5                          | 1.32               | 89.44              |
| 12                            | 5.33               | 55.58333333        |
| 12.5                          | 5.35               | 57.2               |
| 12                            | 5.67               | 52.75              |
| 12.5                          | 5.78               | 53.76              |
| 12                            | 2.33               | 80.58333333        |
| 12.5                          | 2.42               | 80.64              |
| 12                            | 5.67               | 52.75              |
| 12.5                          | 5.8                | 53.6               |
| 12                            | 6.17               | 48.58333333        |
| 12.5                          | 6.4                | 48.8               |
| 12                            | 1.83               | 84.75              |
| 12.5                          | 1.9                | 84.8               |

|      |      |             |
|------|------|-------------|
| 12.5 | 6.5  | 48          |
| 12   | 6.67 | 44.41666667 |
| 12.5 | 6.8  | 45.6        |
| 12   | 6.83 | 43.08333333 |
| 12.5 | 6.9  | 44.8        |
| 12   | 6.87 | 42.75       |
| 12.5 | 1.3  | 89.6        |
| 12   | 1.29 | 89.25       |
| 12.5 | 5.91 | 52.72       |
| 12   | 5.5  | 54.16666667 |
| 12.5 | 5.8  | 53.6        |
| 12   | 5.77 | 51.91666667 |
| 12.5 | 3.9  | 68.8        |
| 12   | 4    | 66.66666667 |
| 12   | 9.67 | 19.41666667 |
| 12.5 | 9.9  | 20.8        |
| 12   | 6.67 | 44.41666667 |
| 12.5 | 6.8  | 45.6        |
| 12   | 4.83 | 59.75       |
| 12.5 | 4.95 | 60.4        |
| 12   | 7.5  | 37.5        |
| 12.5 | 8    | 36          |
| 12   | 6.33 | 47.25       |
| 12.5 | 6.5  | 48          |
